# Supplementary material for: Impact of Little Cigars and Cigarillos Packaging Features on Product Preference
Source: MDPI journal article supplement (doi:10.3390/ijerph182111443), 2021-10-30
Supplement: s1 [file s1]

**Table S1.** Summary Statistics (N=566).

| Variables                        | Mean/% | Std. Dev. |
|----------------------------------|--------|-----------|
| Demographics                     |        |           |
| Age (18-34)                      | 27.96  | 4.08      |
| Female                           | 63%    | 0.48      |
| Race/Ethnicity                   |        |           |
| Hispanic                         | 19%    | 0.39      |
| White                            | 71%    | 0.45      |
| Black                            | 15%    | 0.36      |
| Other/multi races                | 12%    | 0.32      |
| Missing race                     | 2%     | 0.14      |
| Income                           |        |           |
| Income: Low < \$25,000           | 35%    | 0.48      |
| Income: Middle \$25,000-\$49,999 | 30%    | 0.46      |
| Income: High \$50,000 or more    | 35%    | 0.48      |
| Tobacco use                      |        |           |
| Ever used LCC                    | 75%    | 0.43      |
| Current use of LCC               | 52%    | 0.50      |
| Daily use of LCC                 | 17%    | 0.38      |
| Someday use of LCC               | 35%    | 0.48      |
| Menthol cigarette smoking        | 56%    | 0.50      |

**Table S2.** Results (N=6,765).

|                                 | MNL $\beta$ (se) | NL $\beta$ (se) | RPL $\beta$ (se) | RPL SD(se)     |
|---------------------------------|------------------|-----------------|------------------|----------------|
| LCC 2 (base)                    |                  |                 |                  |                |
| ASC: LCC 1                      | -0.07** (0.03)   | -0.03* (0.02)   | -0.09** (0.03)   | --             |
| ASC: Opt out                    | -3.87 (2.46)     | -3.61*** (0.37) | -4.01*** (0.4)   | --             |
| Descriptor                      |                  |                 |                  |                |
| Smooth (base)                   |                  |                 |                  |                |
| Satisfying                      | -0.1*** (0.03)   | -0.06*** (0.02) | -0.1*** (0.04)   | 0.06(0.09)     |
| Sweet                           | 0.09* (0.05)     | 0.04 (0.03)     | 0.1** (0.05)     | 0.41 (0.58)    |
| Flavor Descriptor               |                  |                 |                  |                |
| Text only (base)                |                  |                 |                  |                |
| Color only                      | 0.21*** (0.05)   | 0.12*** (0.03)  | 0.23*** (0.04)   | 0.01 (0.08)    |
| Color and Text                  | 0.29*** (0.05)   | 0.16*** (0.04)  | 0.3*** (0.05)    | 0.1 (0.13)     |
| Flavors                         |                  |                 |                  |                |
| Grape (base)                    |                  |                 |                  |                |
| Menthol                         | -0.21*** (0.08)  | -0.12*** (0.03) | -0.25*** (0.06)  | 0.84*** (0.32) |
| Tobacco/Regular                 | -0.25*** (0.08)  | -0.14*** (0.04) | -0.29*** (0.05)  | 0.003 (0.05)   |
| Wine                            | -0.25*** (0.07)  | -0.15*** (0.04) | -0.27*** (0.06)  | 0.13 (0.19)    |
| Other pack attributes           |                  |                 |                  |                |
| Pack size                       | 0.05* (0.03)     | 0.03*** (0.01)  | 0.06*** (0.02)   | 0.27*** (0.09) |
| Price                           | -1.42*** (0.13)  | -0.79*** (0.15) | -1.56*** (0.09)  | 0.05 (0.07)    |
| Demographics                    |                  |                 |                  |                |
| Age                             | -0.04 (0.08)     | -0.04*** (0.01) | -0.05*** (0.01)  | --             |
| Female                          | -0.21 (0.67)     | -0.22** (0.1)   | -0.22** (0.1)    | --             |
| Race                            |                  |                 |                  |                |
| Other/multi/missing race (base) |                  |                 |                  |                |
| White                           | 0.20 (0.89)      | 0.19 (0.14)     | 0.22 (0.15)      | --             |
| Black                           | -0.34 (1)        | -0.35** (0.17)  | -0.35** (0.17)   | --             |
| Ethnicity                       |                  |                 |                  |                |

|                                       |              |                |                |    |
|---------------------------------------|--------------|----------------|----------------|----|
| Hispanic vs. nonHispanic              | 0.19 (0.76)  | 0.19 (0.12)    | 0.21(0.13)     | -- |
| Income                                |              |                |                |    |
| Low (base)                            |              |                |                |    |
| Middle                                | 0.29 (0.63)  | 0.28** (0.11)  | 0.31*** (0.12) | -- |
| High                                  | 0.04 (0.71)  | 0.03 (0.1)     | 0.04(0.11)     | -- |
| Tobacco use                           |              |                |                |    |
| Smoking menthol cigarettes vs. others | -0.23 (0.61) | -0.23** (0.09) | -0.27*** (0.1) | -- |
| Not smoking LCCs (base)               |              |                |                |    |
| Smoking LCCs some days                | 0.63 (0.61)  | 0.62*** (0.1)  | 0.68*** (0.11) | -- |
| Smoking LCCs daily                    | 0.71 (0.75)  | 0.69*** (0.13) | 0.75*** (0.14) | -- |
| IV (lcc)                              | --           | 0.53*** (0.1)  |                |    |
| SD (lcc)                              | --           | 2.42*** (0.47) |                |    |
| Log Likelihood                        | -5784        | -5775          | -5781          |    |
| AIC                                   | 11611        | 11594          | 11624          |    |

Note: \*\*\*  $p < 0.01$ , \*\*  $p < 0.05$ , \* $p < 0.1$ . Standard errors (S.E) were clustered at the individual level. SEs were clustered by ID. MNL-Multinomial Logit regression; NL-Nested Logit regression; RPL- Random Parameter Logit regression.

**Table S3.** Marginal willingness to Pay (WTP) based on MNL model estimates (N=6,765).

|                     |          |      |
|---------------------|----------|------|
| Quality Descriptor. |          |      |
| Smooth (base)       |          |      |
| Satisfying          | -0.07*** | 0.02 |
| Sweet               | 0.06*    | 0.03 |
| Flavor Depiction    |          |      |
| Text only (base)    |          |      |
| Color only          | 0.15***  | 0.04 |
| Color and Text      | 0.2***   | 0.04 |
| Flavors             |          |      |
| Grape (base)        |          |      |
| Menthol             | -0.15**  | 0.06 |
| Tobacco/Regular     | -0.17*** | 0.06 |
| Wine                | -0.18*** | 0.05 |
| Pack size           | 0.04*    | 0.02 |

Note: \*\*\*  $p < 0.01$ , \*\*  $p < 0.05$ , \* $p < 0.1$ .

**Consumer Beliefs and Attitudes Survey**

Like Page

Sponsored · 

Complete a short survey and get a \$20 gift card if you qualify!



**Consumer Beliefs and Attitudes Survey**

The Qualtrics Insight Platform makes sophisticated research simple and empowers users to capture customer market and employee insights in one place.

QUALTRICS.COM

Learn More

 Like

 Comment

 Share

**Figure S1** Facebook recruitment advertisement
